# Supplementary material for: Healthier central England or North–South divide? Analysis of national survey data on smoking and high-risk drinking
Source: PubMed Central journal article supplement (PMC5353327; doi:10.1136/bmjopen-2016-014210), 2017-03-01
Supplement: bmjopen-2016-014210supp_figures.pdf [file bmjopen-2016-014210supp_figures.pdf]

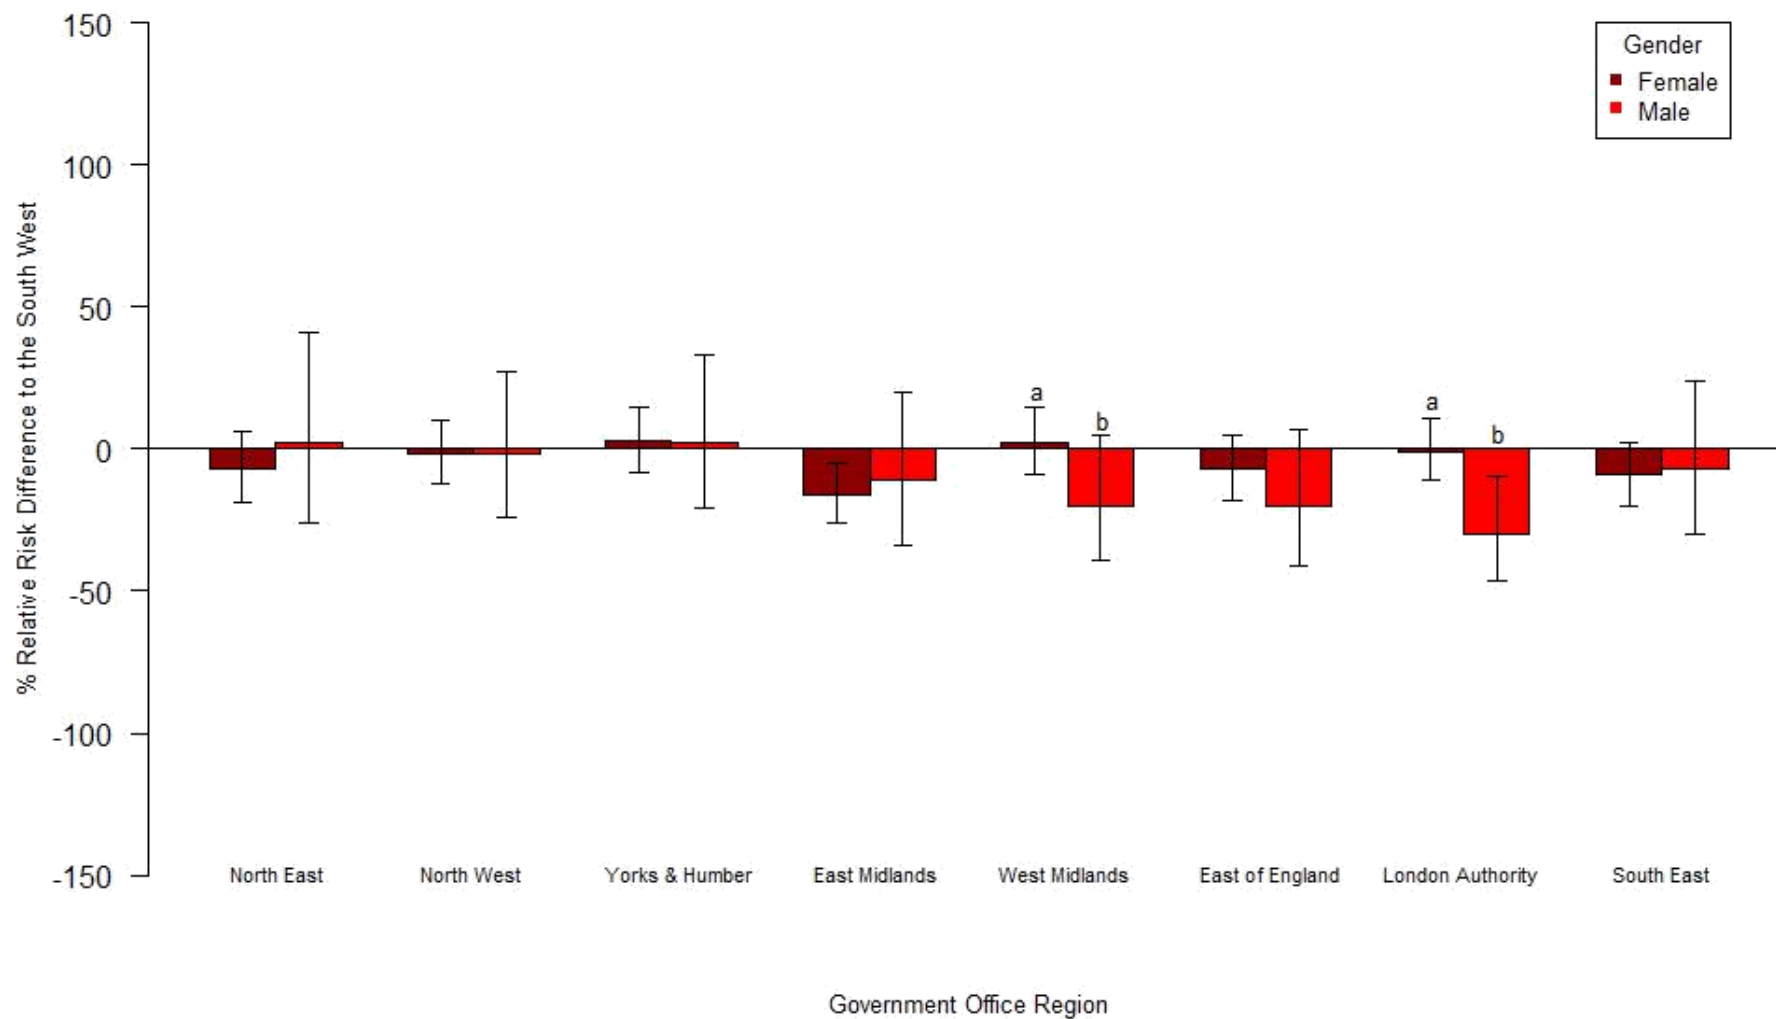

**Supplementary Figure 1:** Moderation effect of gender on the association between Government Office Region and smoking

*Note: Bars reflect 95% confidence intervals; Confidence intervals which do not straddle 0 indicate a significantly different risk of smoking in that region relative to the South West for the subgroup under investigation; 'a' and 'b' reflect a significant interaction effect at  $p < 0.05$  i.e. the relative risk difference of smoking for subgroup 'a' is significantly different to subgroup 'b'*

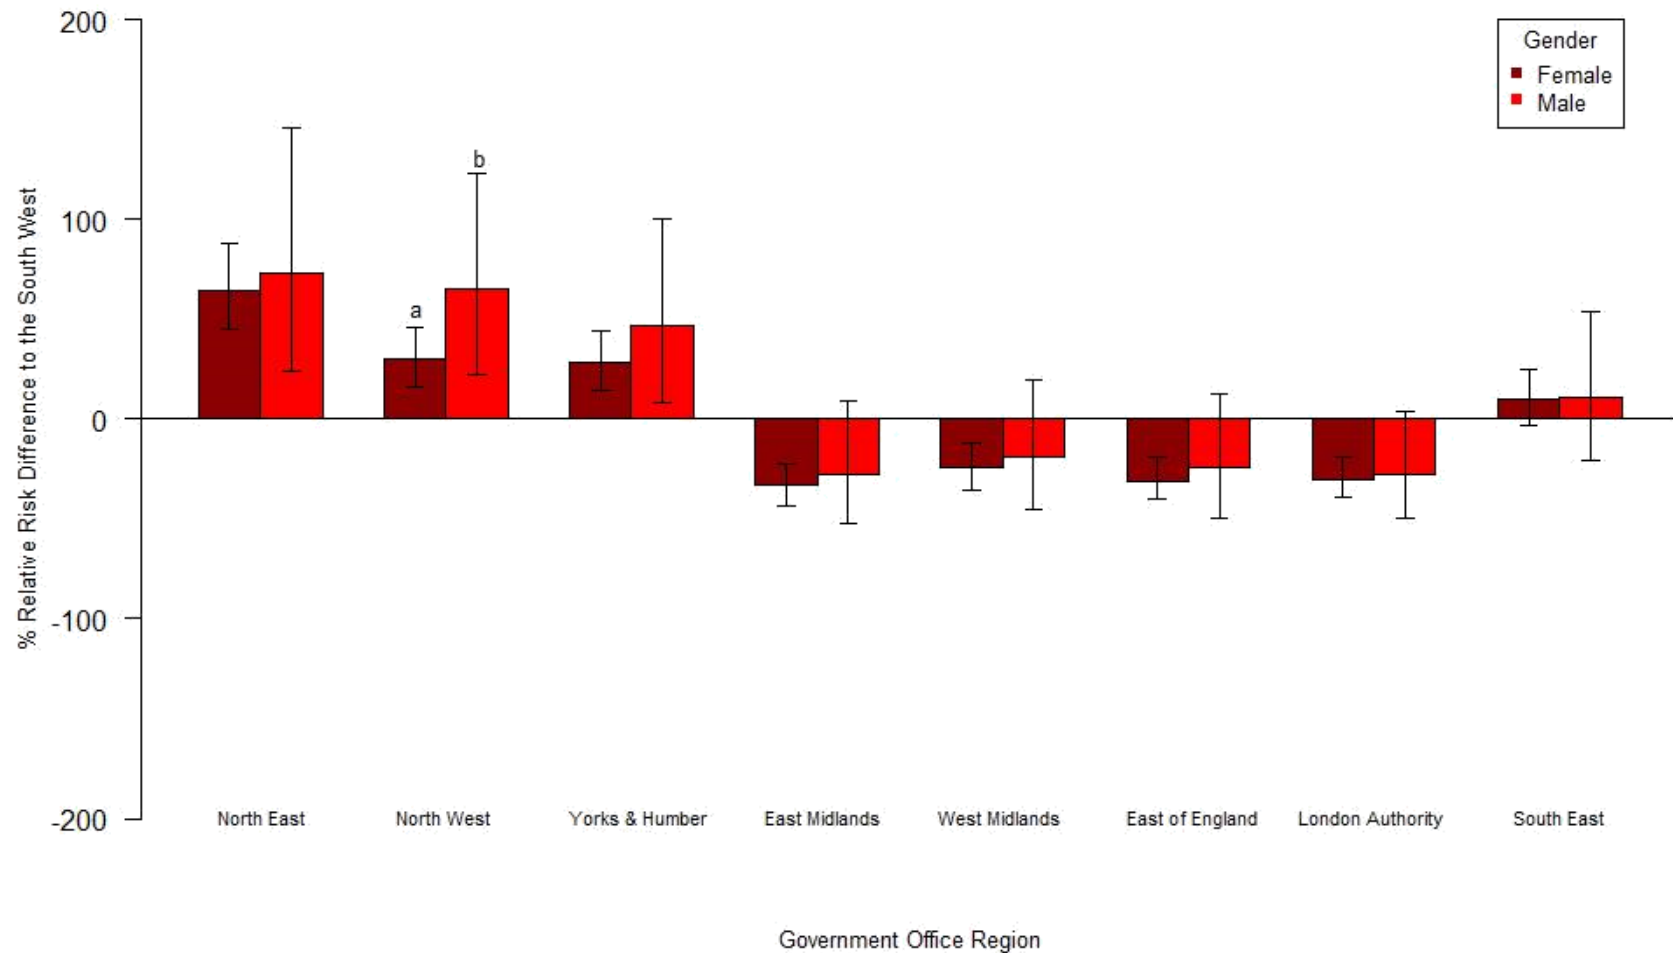

**Supplementary Figure 2:** Moderation effect of gender on the association between Government Office Region and high-risk drinking

*Note: Bars reflect 95% confidence intervals; Confidence intervals which do not straddle 0 indicate a significantly different risk of high-risk drinking in that region relative to the South West for the subgroup under investigation; 'a' and 'b' reflect a significant interaction effect at  $p < 0.05$  i.e. the relative risk difference of high-risk drinking for sub-group 'a' is significantly different to subgroup 'b'*

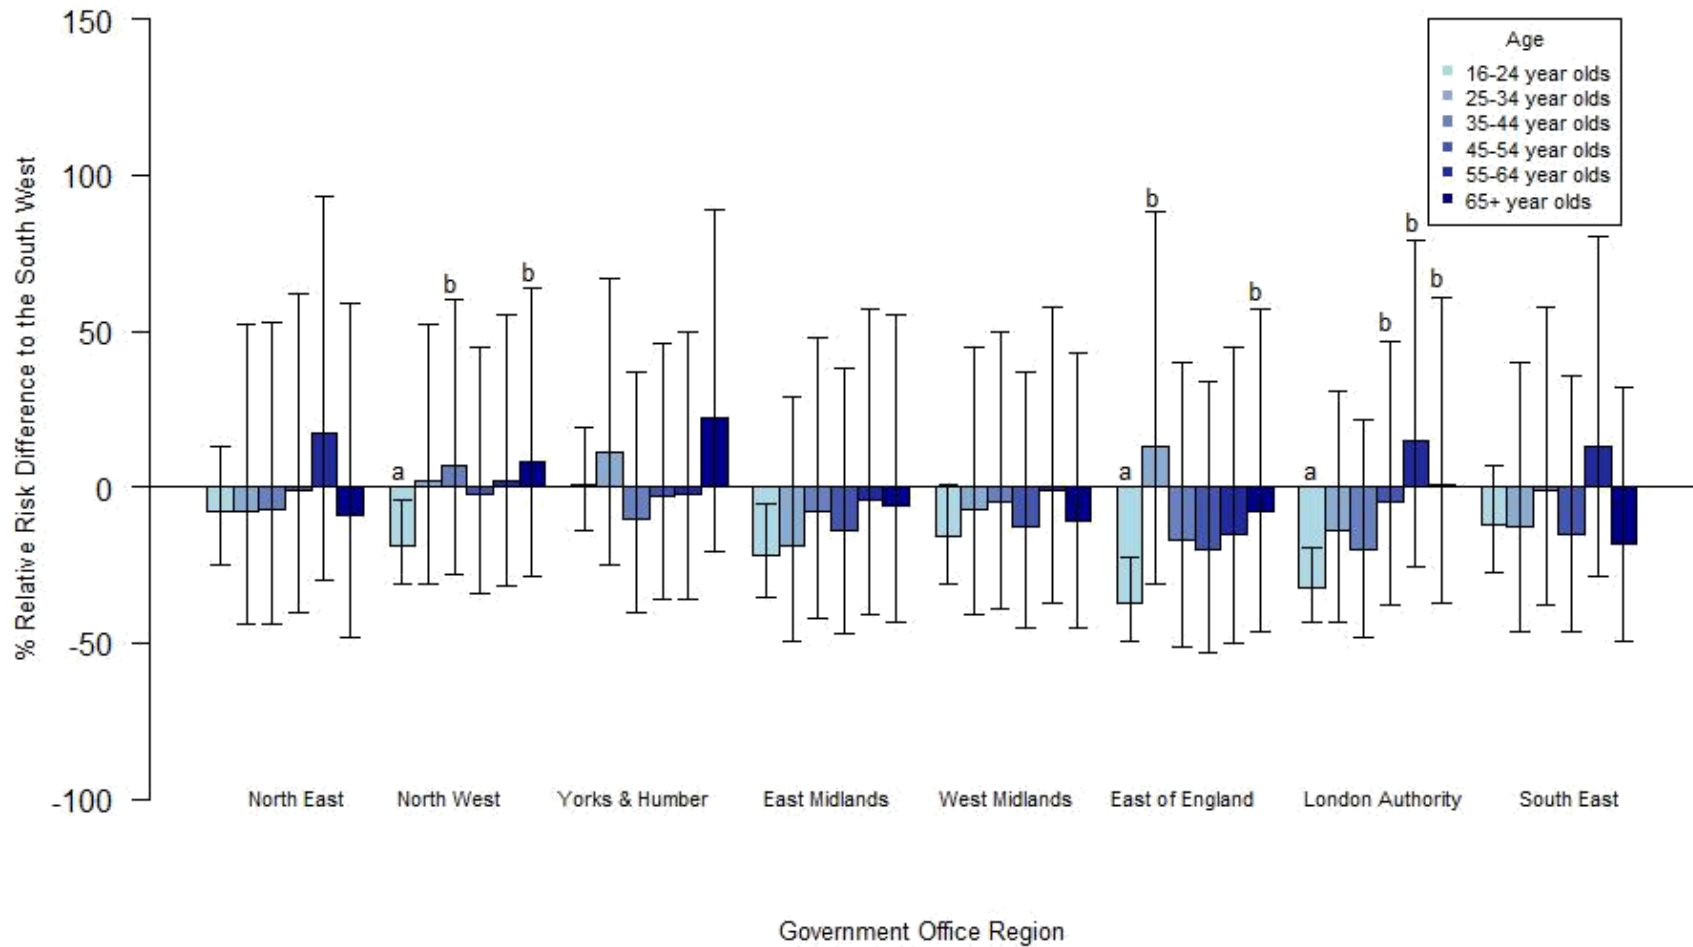

**Supplementary Figure 3:** Moderation effect of age on the association between Government Office Region and smoking

*Note: Bars reflect 95% confidence intervals; Confidence intervals which do not straddle 0 indicate a significantly different risk of smoking in that region relative to the South West for the subgroup under investigation; 'a' and 'b' reflect a significant interaction effect at  $p < 0.05$  i.e. the relative risk difference of smoking for subgroup 'a' is significantly different to subgroup 'b'*

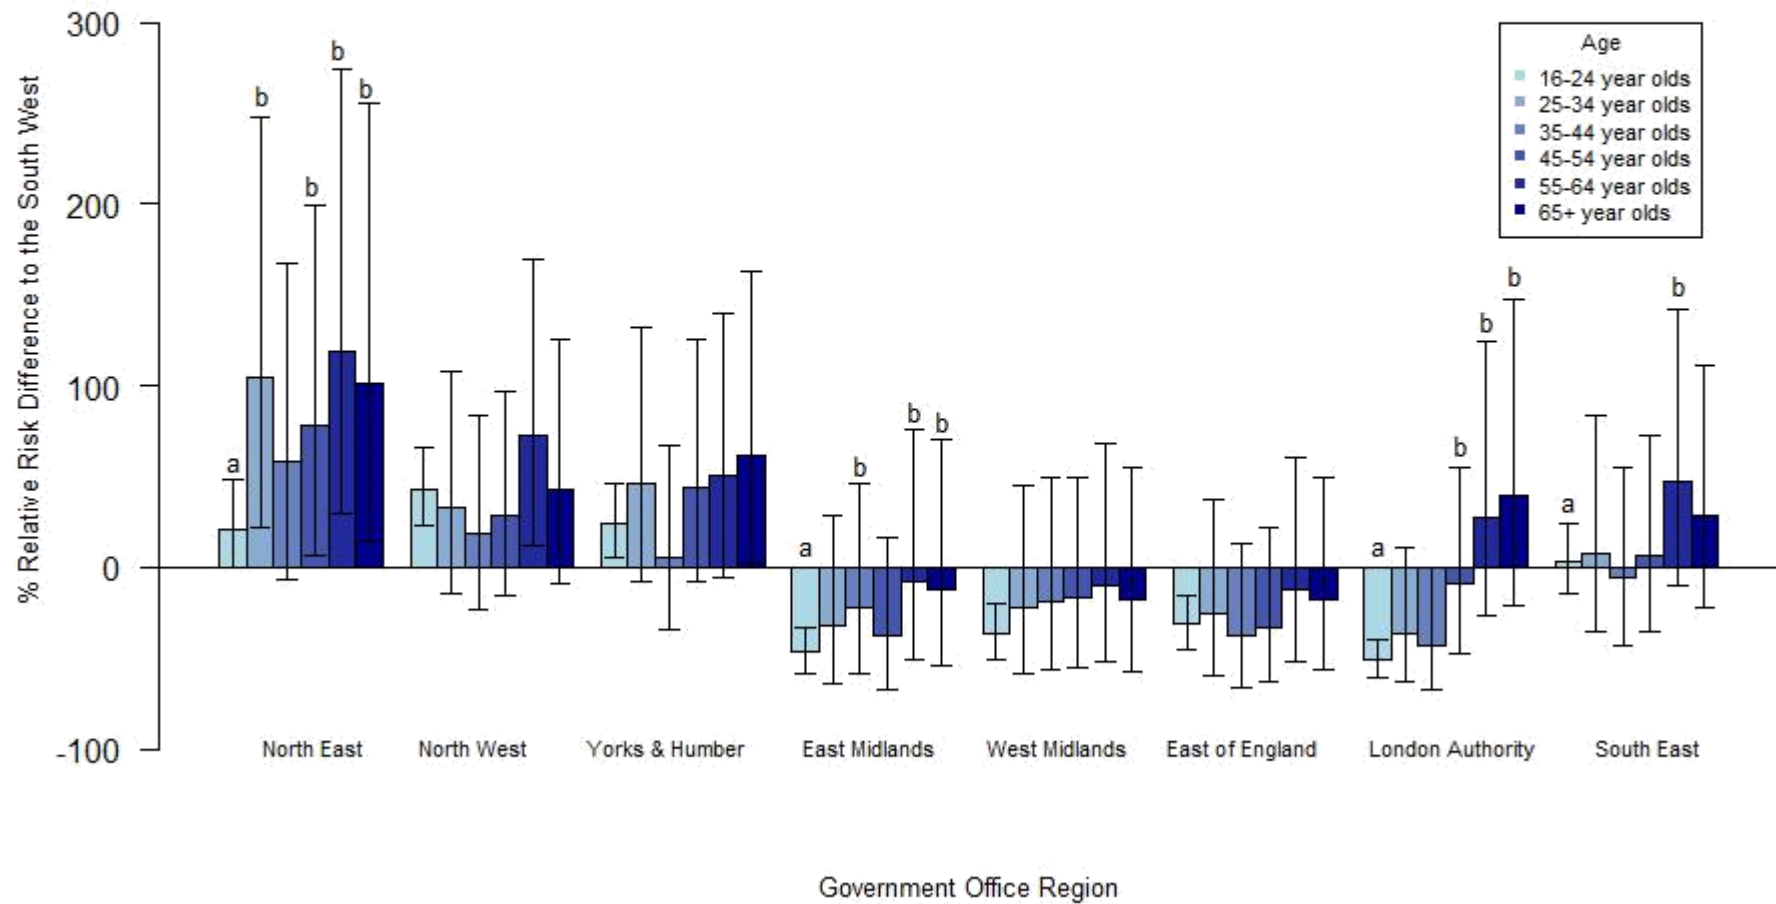

**Supplementary Figure 4:** Moderation effect of age on the association between Government Office Region and high-risk drinking

Note: Bars reflect 95% confidence intervals; Confidence intervals which do not straddle 0 indicate a significantly different risk of high-risk drinking in that region relative to the South West for the subgroup under investigation; 'a' and 'b' reflect a significant interaction effect at  $p < 0.05$  i.e. the relative risk difference of high-risk drinking for sub-group 'a' is significantly different to subgroup 'b'

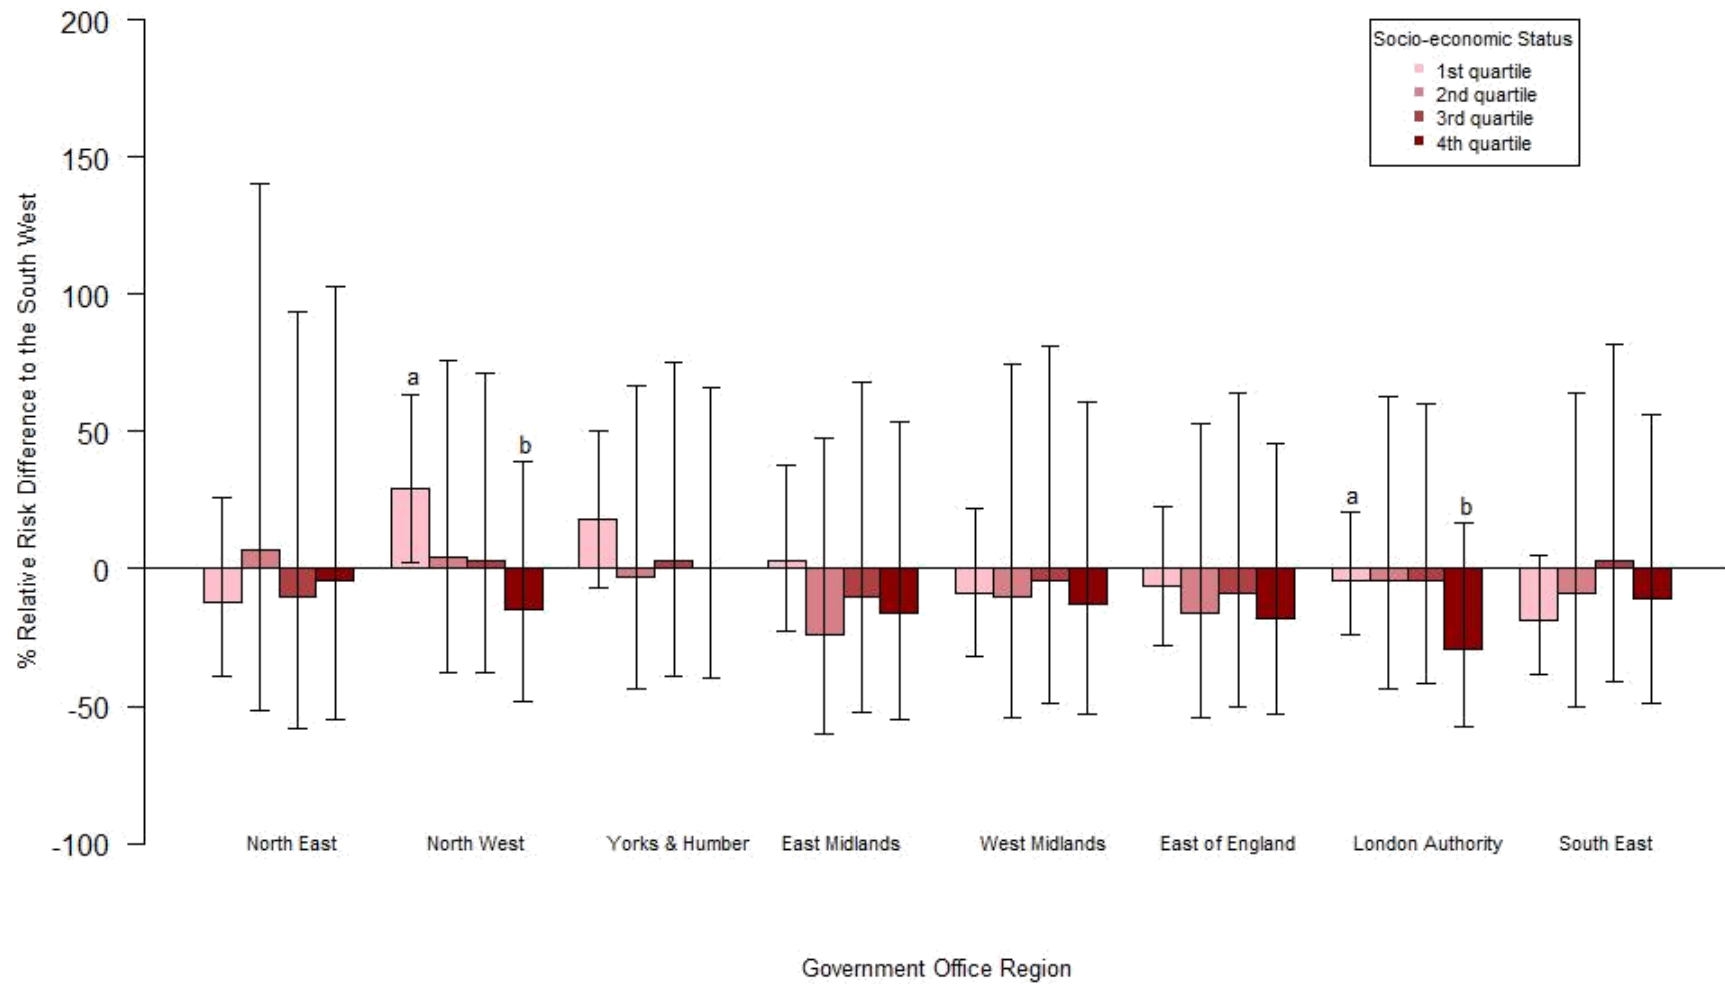

**Supplementary Figure 5:** Moderation effect of socio-economic status on the association between Government Office Region and smoking

*Note: Bars reflect 95% confidence intervals; Confidence intervals which do not straddle 0 indicate a significantly different risk of smoking in that region relative to the South West for the subgroup under investigation; 'a' and 'b' reflect a significant interaction effect at  $p < 0.05$  i.e. the relative risk difference of smoking for sub-group 'a' is significantly different to subgroup 'b'*

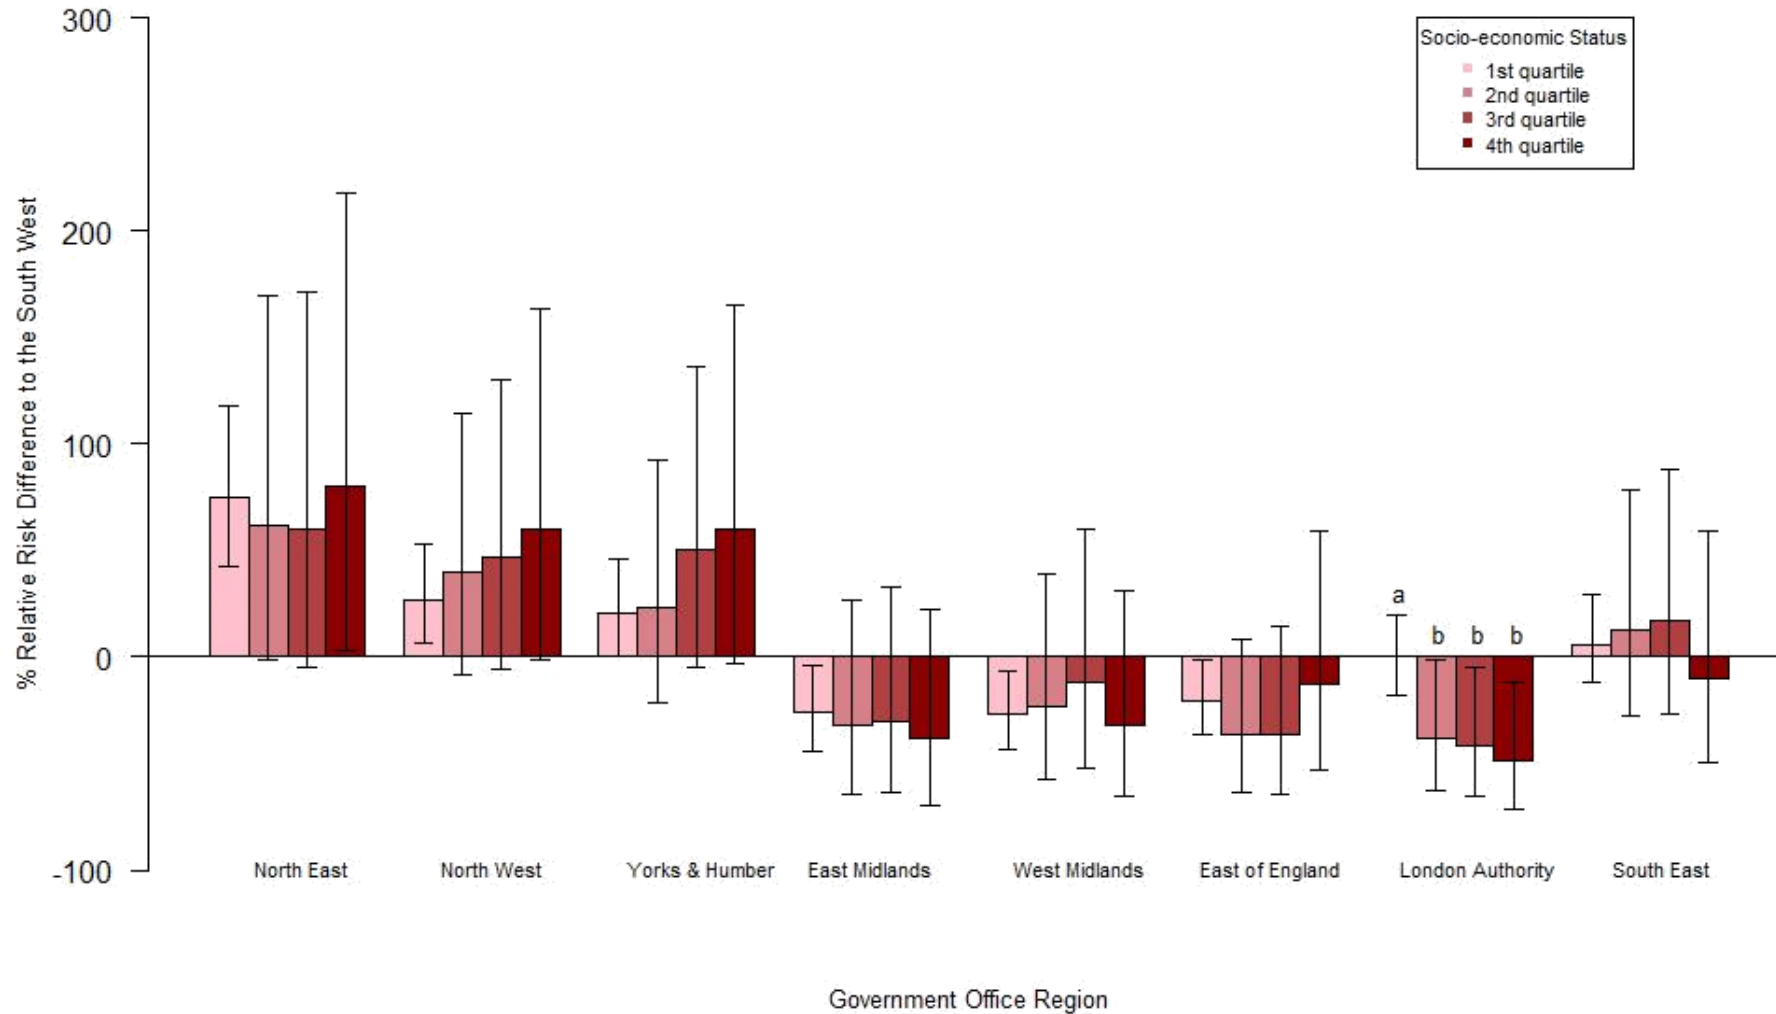

**Supplementary Figure 6:** Moderation effect of socio-economic status on the association between Government Office Region and high-risk drinking

*Note: Bars reflect 95% confidence intervals; Confidence intervals which do not straddle 0 indicate a significantly different risk of high-risk drinking in that region relative to the South West for the subgroup under investigation; 'a' and 'b' reflect a significant interaction effect at  $p < 0.05$  i.e. the relative risk difference of high-risk drinking for sub-group 'a' is significantly different to subgroup 'b'*

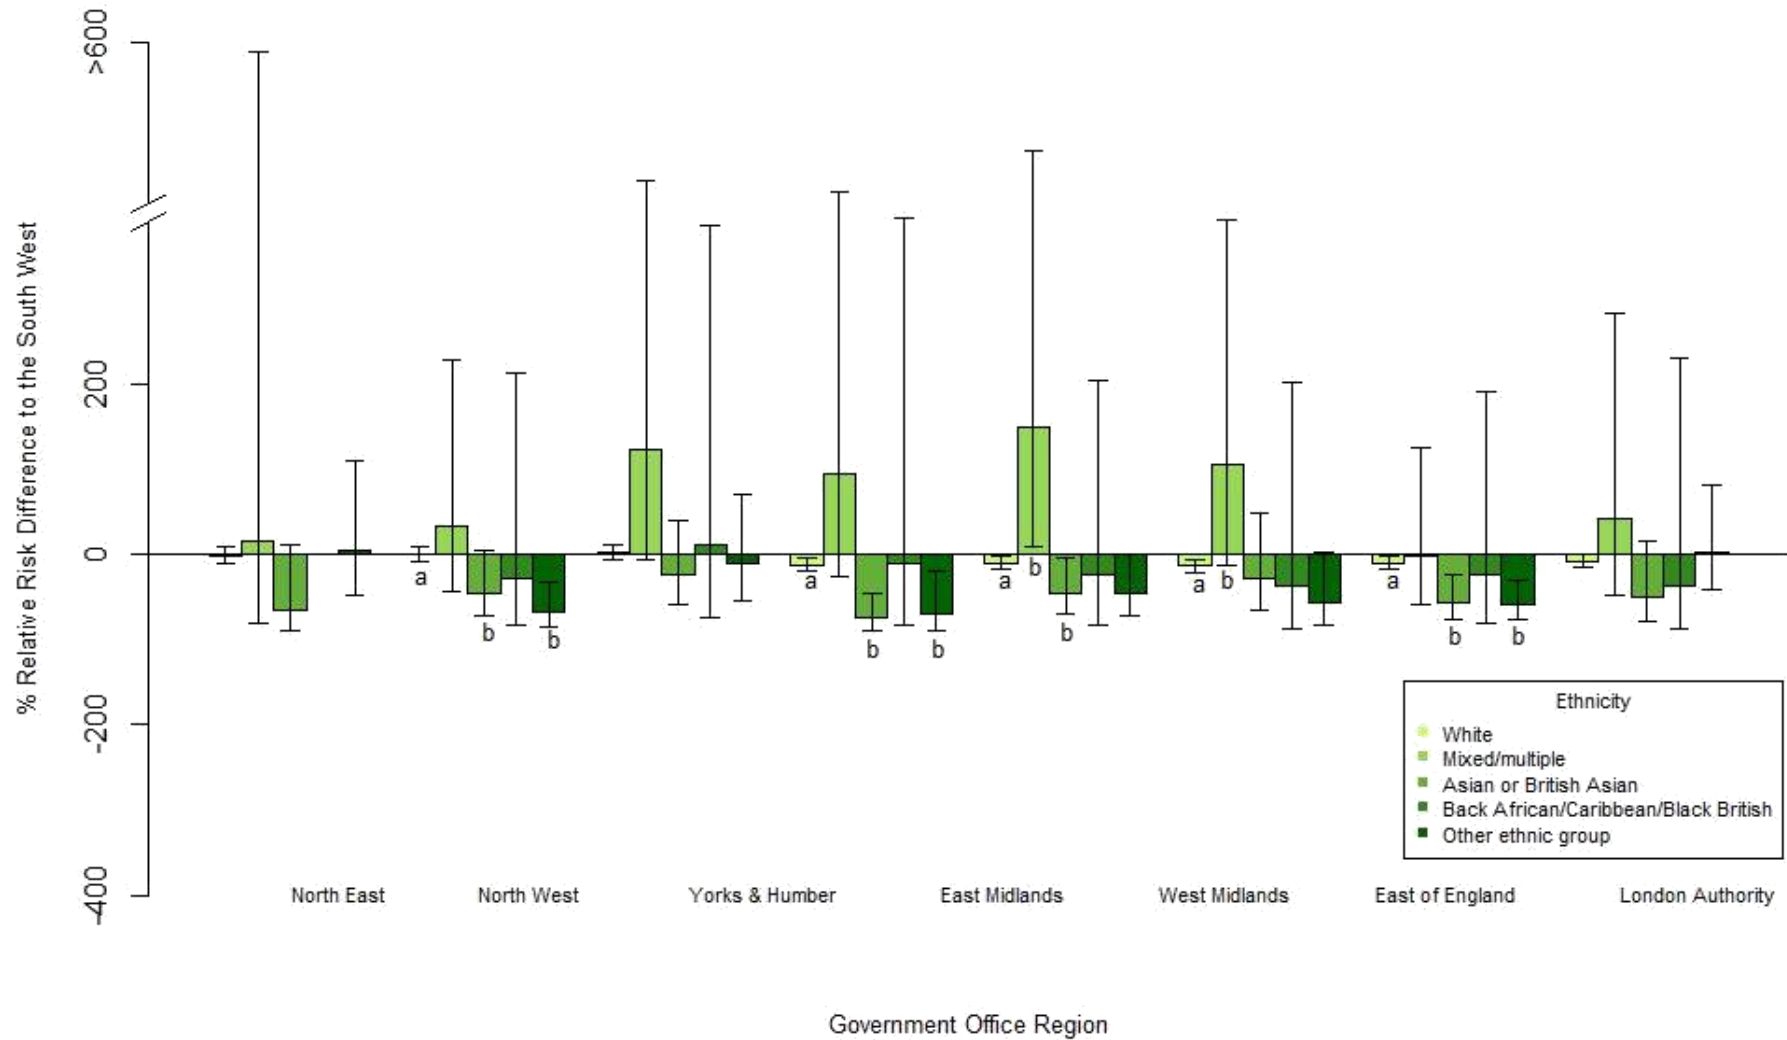

**Supplementary Figure 7:** Moderation effect of ethnicity on the association between Government Office Region and smoking

*Note: Bars reflect 95% confidence intervals; Confidence intervals which do not straddle 0 indicate a significantly different risk of smoking in that region relative to the South West for the subgroup under investigation; 'a' and 'b' reflect a significant interaction effect at  $p < 0.05$  i.e. the relative risk difference of smoking for subgroup 'a' is significantly different to subgroup 'b'*

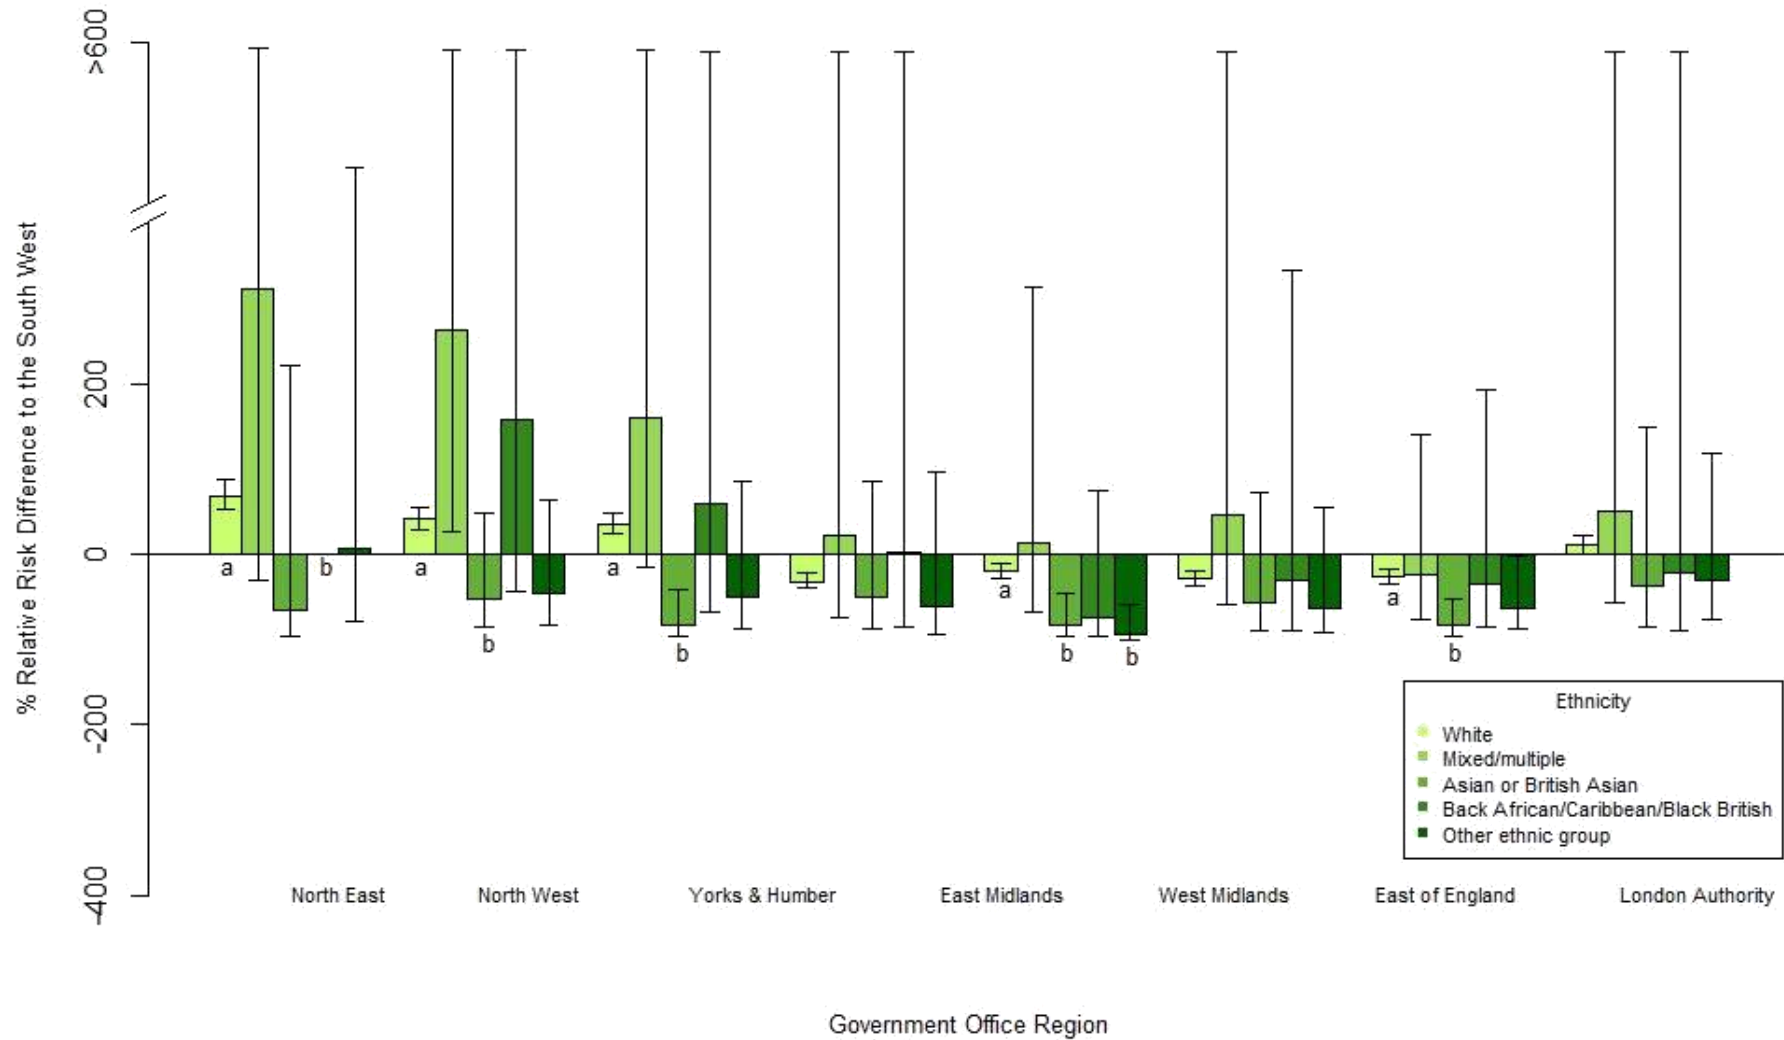

**Supplementary Figure 8:** Moderation effect of ethnicity on the association between Government Office Region and high-risk drinking

*Note: Bars reflect 95% confidence intervals; Confidence intervals which do not straddle 0 indicate a significantly different risk of high-risk drinking in that region relative to the South West for the subgroup under investigation; 'a' and 'b' reflect a significant interaction effect at  $p < 0.05$  i.e. the relative risk difference of high-risk drinking for subgroup 'a' is significantly different to subgroup 'b'*



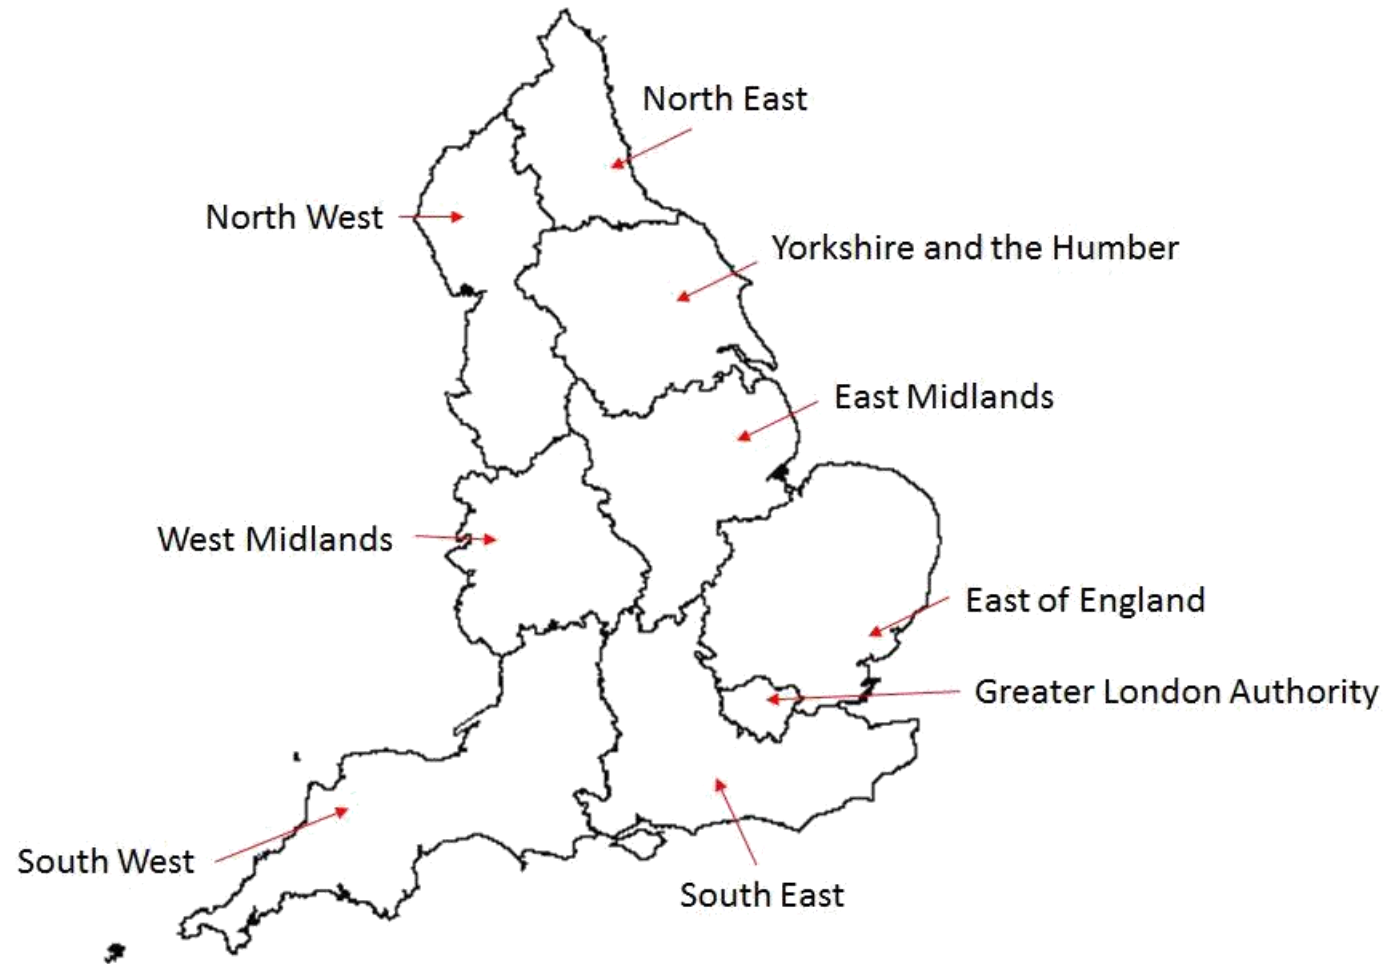

Supplementary Figure 9: Government Office Regions in England
